# Supplementary material
Source: MDPI journal article supplement (https://www.mdpi.com/2073-4433/14/3/579)
Supplement: s1 [file s1 › atmosphere-2276626-supplementary.pdf]

# Emission Source Areas of Fine Particulate Matter (PM<sub>2.5</sub>) in Ho Chi Minh City, Vietnam

Tuyet Nam Thi Nguyen <sup>1,\*</sup>, Nguyen Xuan Du <sup>2</sup> and Nguyen Thi Hoa <sup>1</sup>

| Content                                                                                                                                                             | Page |
|---------------------------------------------------------------------------------------------------------------------------------------------------------------------|------|
| Figure S1 Monthly rainfall amount monitored at Mac Dinh Chi station in Ho Chi Minh City                                                                             | S2   |
| Figure S2 Monthly variations in the relative humidity and ambient air temperature in Ho Chi Minh City                                                               | S3   |
| Figure S3 Monthly wind speed in Ho Chi Minh City during the study period.                                                                                           | S4   |
| Figure S4 Hourly variations in the incoming shortwave flux, relative humidity, and ambient air temperature in the (a) dry and (b) rainy seasons of Ho Chi Minh City | S5   |
| Table S1 Mass concentrations of PM <sub>2.5</sub> in Ho Chi Minh City, Vietnam, and some other cities in Asia.                                                      | S6   |
| Figure S5 Results of the PLS for the (a) dry and (b) rainy seasons                                                                                                  | S7   |
| Figure S6 Correlation matrix of PM <sub>2.5</sub> concentrations and meteorological parameters                                                                      | S8   |
| Text S1 Relationships between the PM <sub>2.5</sub> mass concentrations and meteorological parameters                                                               | S8   |
| Figure S7 Wind directions of the dry and rainy seasons in HCM City                                                                                                  | S9   |
| Figure S8 Locations of Ho Chi Minh City and its surrounding regions                                                                                                 | S10  |
| Table S2 Mass concentrations of PM <sub>2.5</sub> in each trajectory cluster                                                                                        | S10  |
| Figure S9 Aerosol optical depth (AOD) observed in Vietnam in the (a) dry and (b) rainy seasons of the study period                                                  | S11  |
| Figure S10 Daily accumulated precipitation observed in Vietnam in the (a) dry and (b) rainy seasons of the study period                                             | S11  |
| References                                                                                                                                                          | S12  |

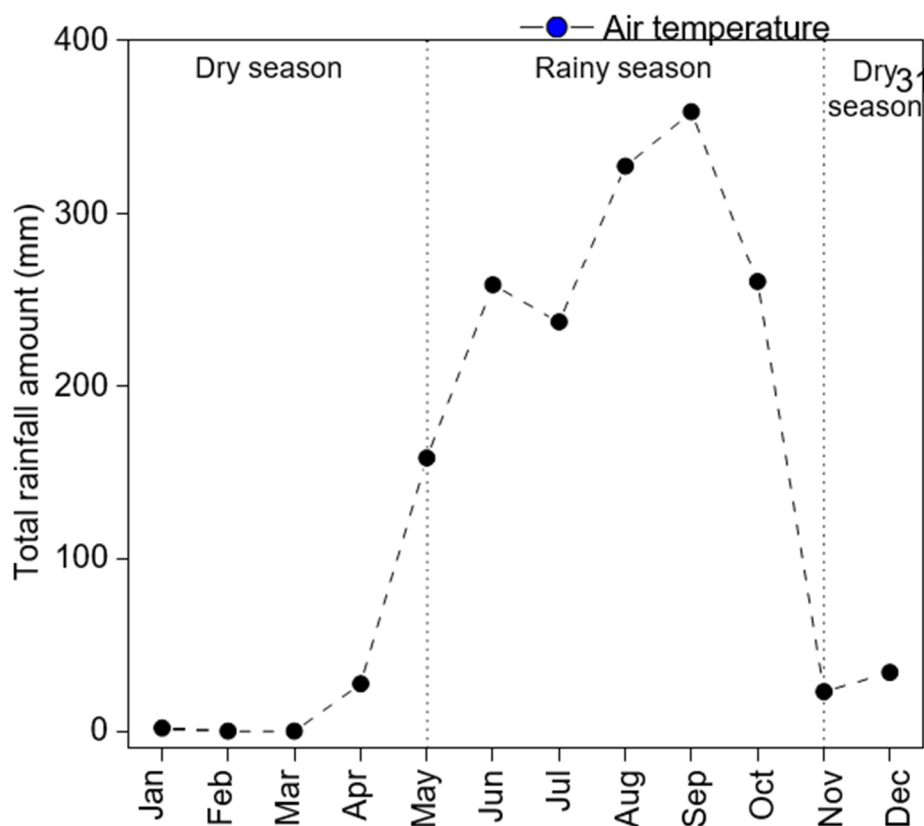

**Figure S1.** Monthly rainfall amount monitored at Mac Dinh Chi station in Ho Chi Minh city during the study period.

**Text S1.** Relationships between the PM<sub>2.5</sub> mass concentrations and meteorological parameters.

The PLS approach was used to understand relationships between the PM<sub>2.5</sub> mass concentrations and meteorological parameters in the dry and rainy seasons of HCM city. As shown in Figure S5, wind speed had the negative relations with the PM<sub>2.5</sub> mass concentrations in both the dry and rainy seasons, meaning that strong winds could lead to the lower PM<sub>2.5</sub> mass concentrations and vice versa. This is because the higher wind speeds can increase the PM<sub>2.5</sub> dispersion and thus, result in a decline in the PM<sub>2.5</sub> mass concentrations. The ambient air temperature and relative humidity also had a significantly negative relations with the PM<sub>2.5</sub> mass concentrations in HCM city, especially in the rainy season (Figure S5b). The higher air temperature would contribute to the expansion of the air mixing layer, which facilitated the vertical mixing of PM<sub>2.5</sub> and led to a decline in PM<sub>2.5</sub> mass concentrations. Additionally, the greater relative humidity in the rainy season ( $82.6 \pm 3.9\%$ ), compared to the dry season ( $68.8 \pm 5.3\%$ ) (Figure S4), would increase the size of particulate matters.

[11] and promote their dry deposition, resulting in a decline in the PM<sub>2.5</sub> mass concentrations. In addition, the PM<sub>2.5</sub> mass concentrations in HCM city had the positive relationships with the air pressure in both the dry and rainy seasons (Figure S5). Indeed, under high-pressure conditions, air pollutants may be prevented from moving upward [12], resulting in an accumulation of PM<sub>2.5</sub> and thus, an increase in PM<sub>2.5</sub> mass concentrations. Furthermore, the positive relation between wind direction and the mass concentrations of PM<sub>2.5</sub> in the dry and rainy seasons would be related to seasonal monsoon, and this issue is more thoroughly discussed in Sections 3.2 and 3.3 of the manuscript.

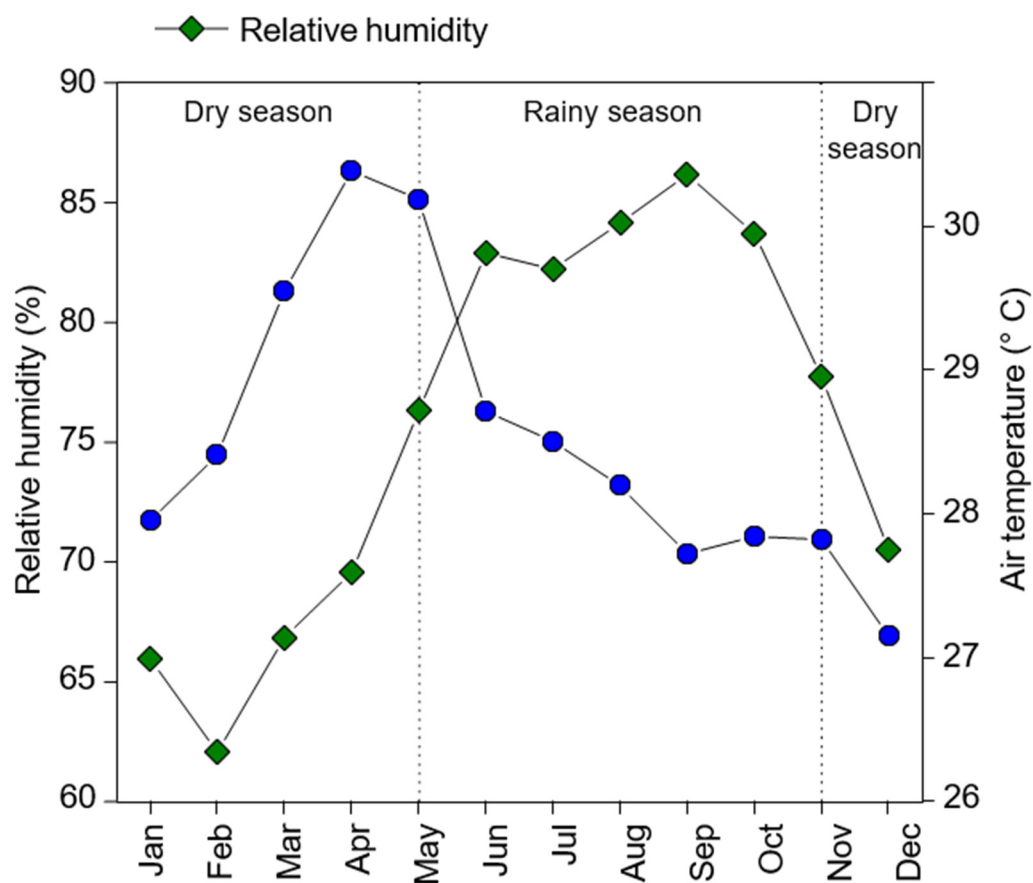

**Figure S2.** Monthly variations of the relative humidity and ambient air temperature in Ho Chi Minh city during the study period.

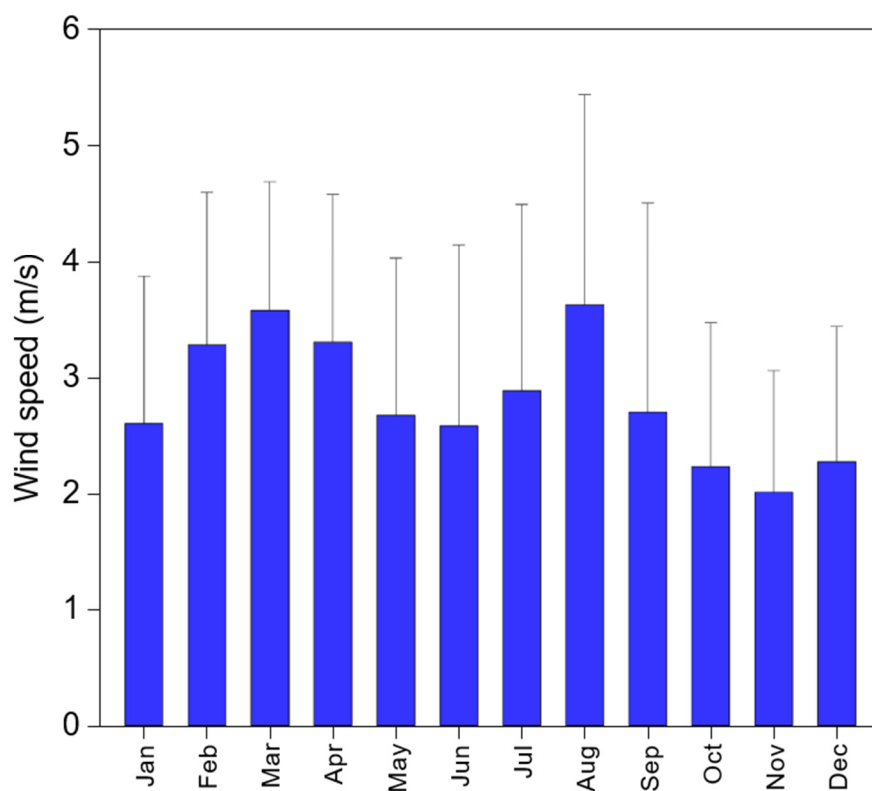

**Figure S3.** Monthly wind speed in Ho Chi Minh city during the study period.

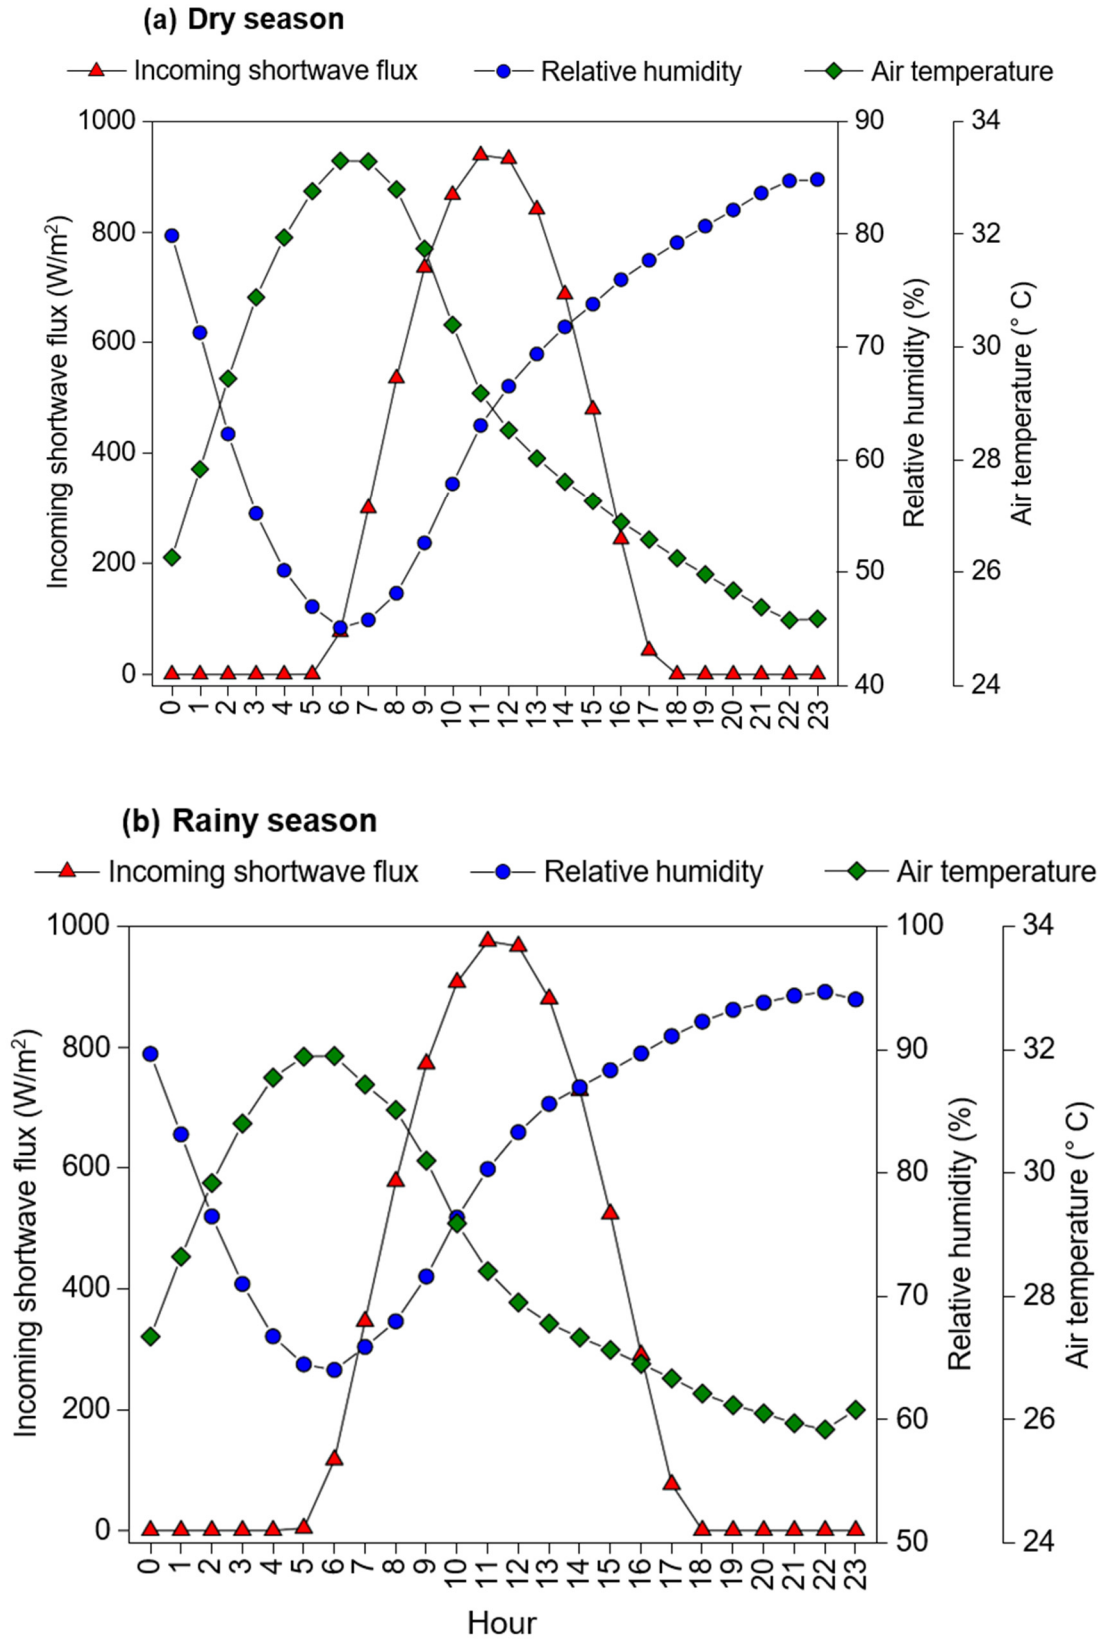

**Figure S4.** Hourly variations of the incoming shortwave flux, relative humidity, and ambient air temperature in the (a) dry and (b) rainy seasons of Ho Chi Minh city.

**Table S1.** Mass concentrations of PM<sub>2.5</sub> in Ho Chi Minh (HCM) city, Vietnam, and some other cities in Asia.

| No | City         | City      | Site/Area  | Period           | Mass Concentration ( $\mu\text{g m}^{-3}$ ) | References |
|----|--------------|-----------|------------|------------------|---------------------------------------------|------------|
| 1  | HCM City     | Vietnam   | Urban      | 2013–2017        | 22.7–38.9 <sup>(*)</sup><br>28±18           | [1,2]      |
| 2  | HCM City     | Vietnam   | Roadside   | 12/2007–01/2008  | 53–151<br>97±31                             | [2]        |
| 3  | Ha Noi       | Vietnam   | Urban      | 2006–2007        | 26–143<br>76±32                             | [3]        |
| 4  | Ha Noi       | Vietnam   | Mixed site | 2015             | 71±48                                       | [4].       |
| 5  | Bangkok      | Thailand  | Roadside   | 2010             | 57±13                                       | [5]        |
| 6  | Bangkok      | Thailand  | Urban      | 08/2017–03/2018  | 77±21 <sup>(**)</sup>                       | [6]        |
| 7  | Kuala Lumpur | Malaysia  | Semi-urban | 07/2014–09/2014  | 6.6–68                                      | [6.7]      |
| 8  | Bandung      | Indonesia | Downtown   | 11/2018– 01/2019 | 18±12<br>29±8.6                             | [8]        |
| 9  | Bandung      | Indonesia | Downtown   | 07/2019– 09/2019 | 39±13                                       | [8]        |
| 10 | HCM City     | Vietnam   | Downtown   | 01/2019–12/2020  | 17–35 <sup>(*)</sup><br>3.5–98<br>25±6.3    | This study |

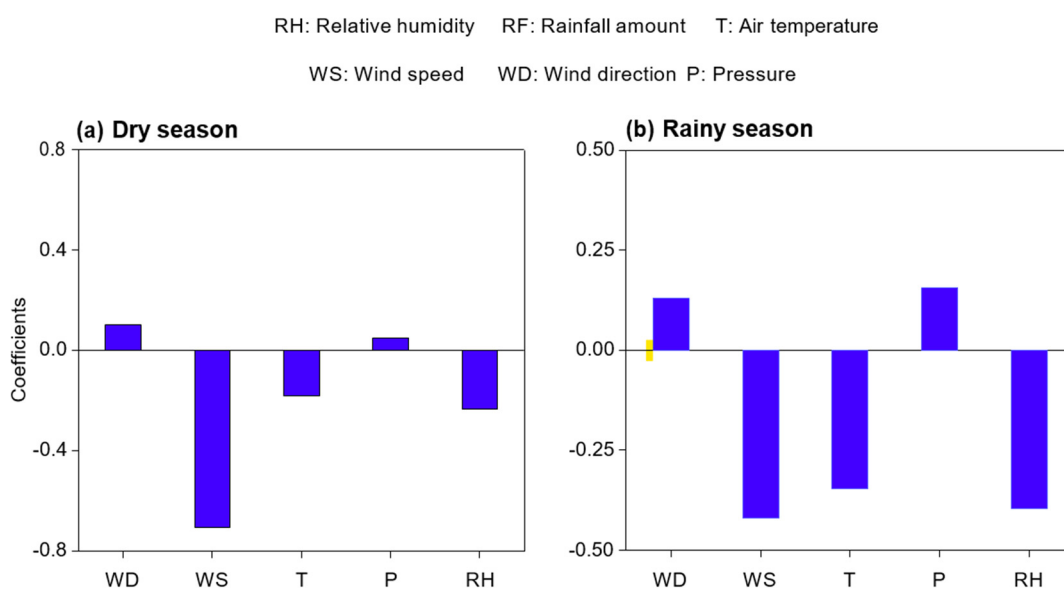

**Figure S5.** Results of the PLS for the (a) dry and (b) rainy seasons. The daily PM<sub>2.5</sub> mass concentrations and meteorological parameters were set as the dependent and independent variables, respectively.

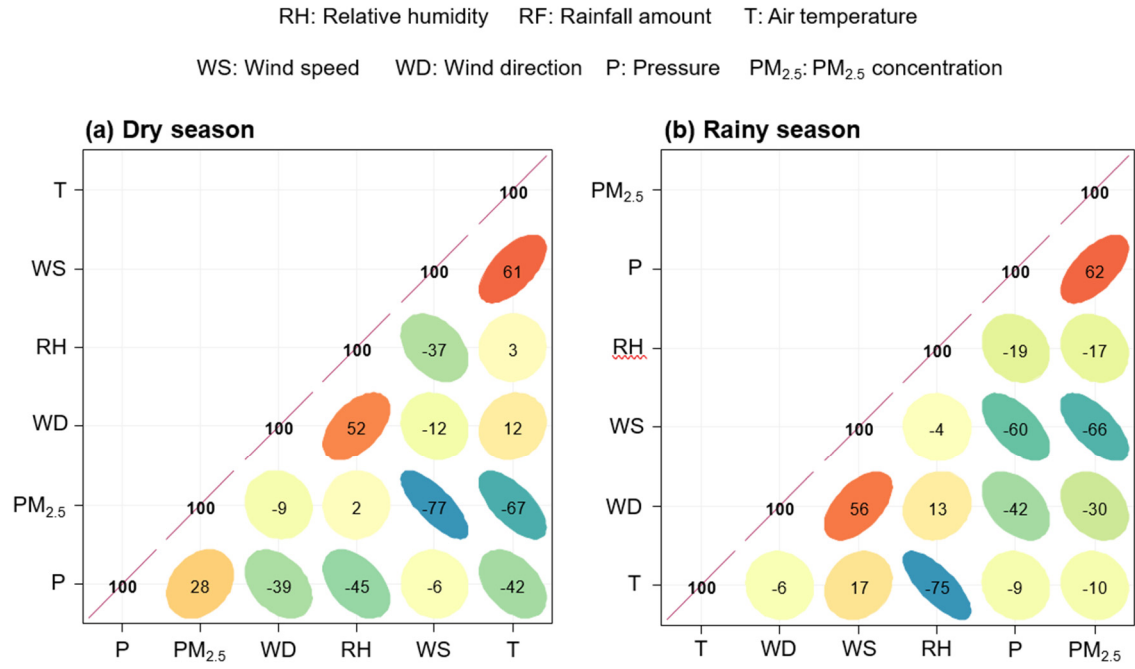

**Figure S6.** Spearman correlation matrix of PM<sub>2.5</sub> concentrations and meteorological parameters in the (a) dry and (b) rainy seasons. The numbers indicate correlation coefficients. RStudio [9] and Openair package [10] were used to generate the correlation matrices.

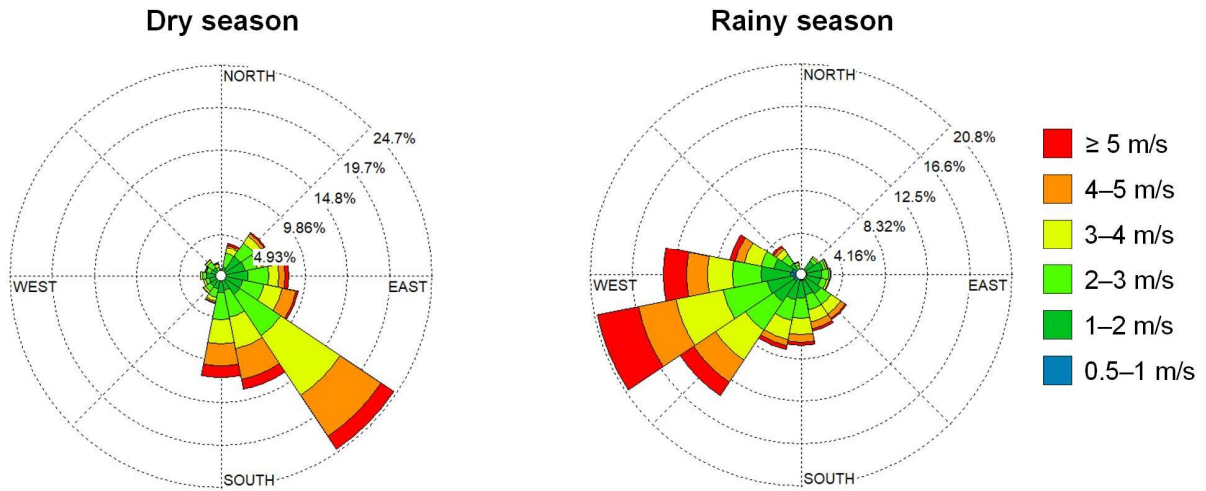

**Figure S7.** Wind directions of the dry and rainy seasons in HCM city during the study period.

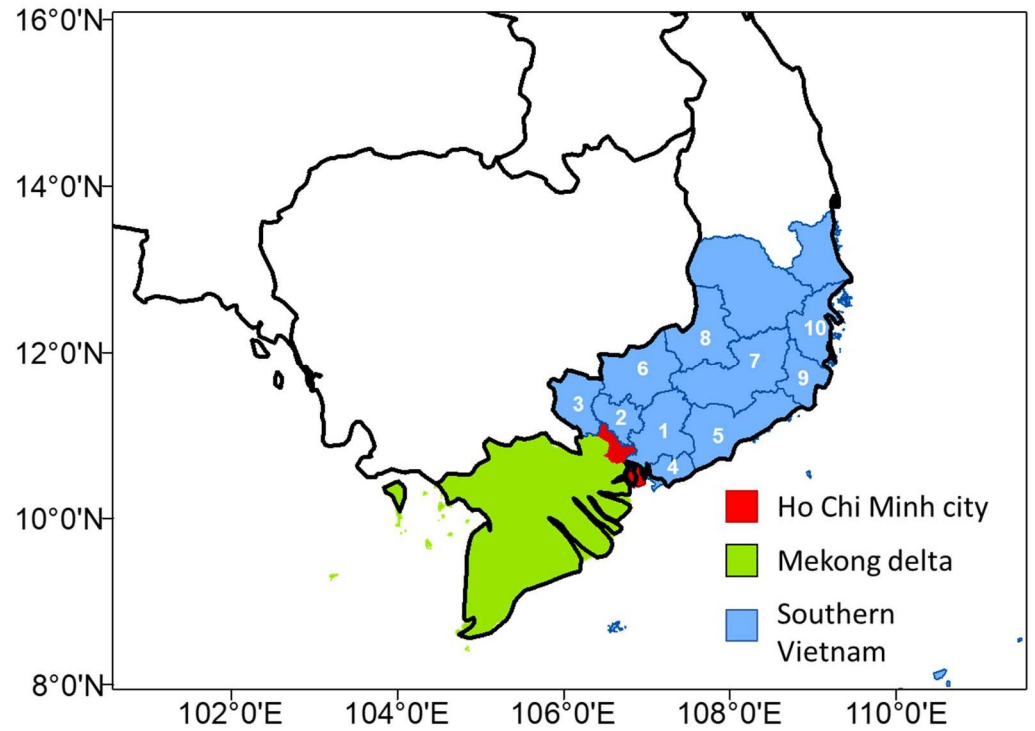

**Figure S8.** Locations of Ho Chi Minh city and its surrounding regions, including the Mekongdelta and several provinces of the southeastern and south-central cost Vietnam: (1) Dong Nai, (2) Binh Duong, (3) Tay Ninh, (4) Vung Tau, (5) Binh Thuan, (6) Binh Phuoc, (7) Lam Dong, (8) Dak Nong, (9) Ninh Thuan, and (10) Khanh Hoa.

**Table S2.** Mass concentrations of PM<sub>2.5</sub> ( $\mu\text{g m}^{-3}$ ) in each trajectory cluster. The analysis was performed using Trajstat plugin in MeteoinfoMap application.

| Cluster no.         | Number of trajectories | Mean | SD   |
|---------------------|------------------------|------|------|
| <i>Dry season</i>   |                        |      |      |
| 1                   | 2,086                  | 30.0 | 14.6 |
| 2                   | 2,113                  | 16.9 | 10.3 |
| 3                   | 2,755                  | 27.9 | 17.5 |
| <i>Rainy season</i> |                        |      |      |
| 1                   | 4,991                  | 21.6 | 13.2 |
| 2                   | 2,628                  | 30.5 | 21.2 |
| 3                   | 2,603                  | 17.7 | 9.10 |

SD: standard deviation.

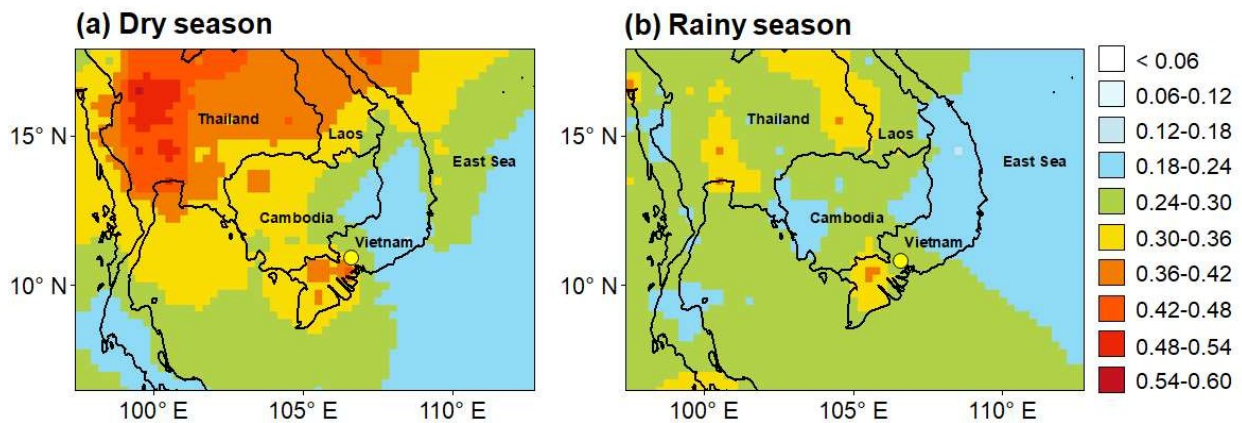

**Figure S9.** Aerosol optical depth (AOD) observed in Vietnam in the (a) dry and (b) rainy seasons of the study period. Data were obtained from the Terra Moderate Resolution ImagingSpectroradiometer (MODIS). The yellow dots represent the monitoring site in HCM city.

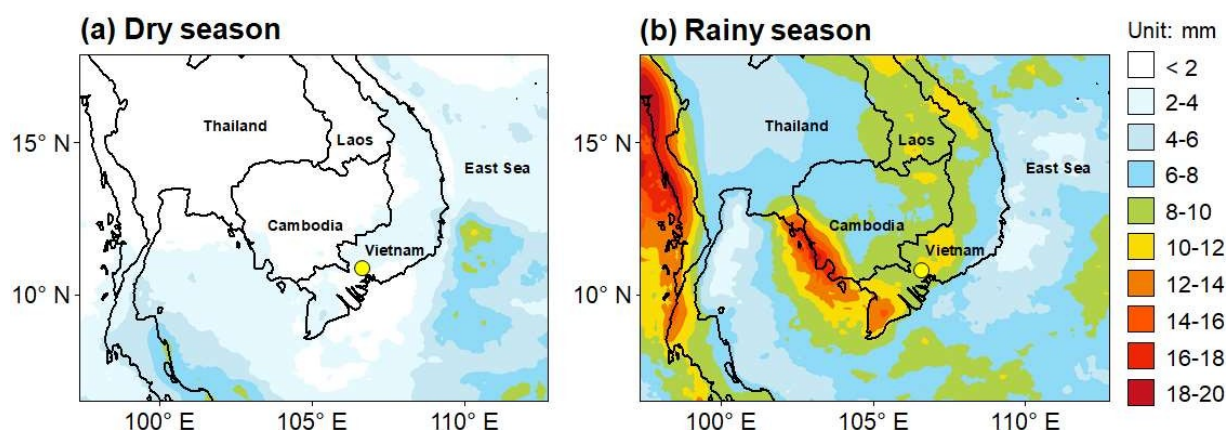

**Figure S10.** Daily accumulated precipitation observed in Vietnam in the (a) dry and (b) rainy seasons of the study period. Data were obtained from the Integrated Multi-satellite Retrievals for Global Precipitation Measurement (GPM IMERG) final product [13]. The yellow dots represent the monitoring site in HCM city.

## References

1. T. T. Hien, N. D. T. Chi, N. T. Nguyen, L. X. Vinh, N. Takenaka and D. H. Huy, Current status of fine particulate matter (PM<sub>2.5</sub>) in Vietnam's most populous city, Ho Chi Minh City, *Aerosol Air Qual. Res.*, 2019, **19**, 2239–2251.
2. N. T. Huong Giang and N. T. Kim Oanh, Roadside levels and traffic emission rates of PM<sub>2.5</sub> and BTEX in Ho Chi Minh City, Vietnam, *Atmos. Environ.*, 2014, **94**, 806–816.
3. C. D. Hai and N. T. Kim Oanh, Effects of local, regional meteorology and emission sources on mass and compositions of particulate matter in Hanoi, *Atmos. Res.*, 2013, **78**, 105–112.
4. N. T. T. Thuy, N. T. Dung, K. Sekiguchi, L. B. Thuy, N. T. T. Hien and R. Yamaguchi, Mass concentrations and carbonaceous compositions of PM<sub>1.0</sub>, PM<sub>2.5</sub>, and PM<sub>10</sub> at urban locations of Hanoi, Vietnam, *Aerosol Air Qual. Res.*, 2018, **18**, 1591–1605.
5. N. T. Kim Oanh, J. Kongpran, N. T. Hang, P. Parkpian, N. T. Q. Hung, S. B. Lee and G. N. Bae, Characterization of gaseous pollutants and PM<sub>2.5</sub> at fixed roadsides and along vehicle traveling routes in Bangkok Metropolitan Region, *Atmos. Res.*, 2013, **77**, 674–685.
6. C. Choochuay, S. Pongpiachan, D. Tipmanee, O. Suttinun, W. Deelaman, Q. Wang, L. Xing, G. Li, Y. Han, J. Palakun and J. Cao, Impacts of PM<sub>2.5</sub> sources on variations in particulate chemical compounds in ambient air of Bangkok, Thailand, *Atmos. Pollut. Res.*, 2020, **11**, 1657–1667.
7. M. F. Khan, N. A. Sulong, M. T. Latif, M. S. M. Nadzir, N. Amil, D. F. M. Hussain, V. Lee, P. N. Hosaini, S. Shaharom, N. A. Y. M. Yusoff, H. M. S. Hoque, J. X. Chung, M. Sahani, N. Mohd Tahir, L. Juneng, K. N. A. Maulud, S. M. S. Abdullah, Y. Fujii, S. Tohno and A. Mizohata, Comprehensive assessment of PM<sub>2.5</sub> physicochemical properties during the Southeast Asia dry season (southwest monsoon), *J. Geophys. Res. Atmos.*, 2016, **121**, 14,589–514,611.
8. D. Sinaga, W. Setyawati, F. Y. Cheng and S.-C. C. Lung, Investigation on daily exposure to PM<sub>2.5</sub> in Bandung city, Indonesia using low-cost sensor, *J. Expo. Sci. Environ. Epidemiol.*, 2020, **30**, 1001–1012.
9. R. Team, RStudio: Integrated development for R, <http://www.rstudio.com/>, (accessed 2022/02/01).
10. D. C. Carslaw and K. Ropkins, openair — An R package for air quality data analysis, *Environ. Modell. Softw.*, 2012, **27–28**, 52–61.
11. S. Squizzato, M. Cazzaro, E. Innocente, F. Visin, P. K. Hopke and G. Rampazzo, Urban air quality in a mid-size city—PM<sub>2.5</sub> composition, sources and identification of impact areas: from local to long range contributions, *Atmos. Res.*, 2017, **186**, 51–62.
12. Z. Chen, D. Chen, C. Zhao, M.-p. Kwan, J. Cai, Y. Zhuang, B. Zhao, X. Wang, B. Chen, J. Yang, R. Li, B. He, B. Gao, K. Wang and B. Xu, Influence of meteorological conditions on PM<sub>2.5</sub> concentrations across China: A review of methodology and mechanism, *Environment International*, 2020, **139**, 105558.
13. Huffman, G.J., E.F. Stocker, D.T. Bolvin, E.J. Nelkin, Jackson Tan (2019), GPM IMERG Final Precipitation L3 1 day 0.1 degree x 0.1 degree V06, Edited by Andrey Savtchenko, Greenbelt, MD, Goddard Earth Sciences Data and Information Services Center (GES DISC), Available online: (accessed on 1 February 2022).
